# Supplementary material
Source: PubMed Central journal article supplement (PMC9337903)
Supplement: KID.0000702022SupplementaryData.pdf [file KID.0000702022SupplementaryData.pdf]

## Supplemental Table 1. Missing Lab Data Profile.

Normonatremia: [Na]: 135-145 mEq/L; Hypernatremia: [Na]: >145 mEq/L, [Na] levels corrected by adding 1.6 mEq/L for each 100 mg/dL above 100 mg/dL of the concomitantly measured serum glucose levels.

| Laboratory tests n(%)       | All Cohort          | Normonatremia         | Hypernatremia     |
|-----------------------------|---------------------|-----------------------|-------------------|
|                             | n= 1,963,020 (100%) | n = 1,902,406 (96.8%) | n = 60,614 (3.2%) |
| Serum albumin (g/dL)        | 675727 (34.42)      | 656081 (34.49)        | 19646 (32.41)     |
| Serum creatinine (mg/dL)    | 165083 (8.41)       | 163175 (8.58)         | 1908 (3.15)       |
| Serum potassium (mEq/L)     | 19024 (0.97)        | 18209 (0.96)          | 815 (1.34)        |
| Glucose (mg/dL)             | 257776 (13.13)      | 255010 (13.4)         | 2766 (4.56)       |
| Hemoglobin A1C              | 1770678 (90.2)      | 1717505 (90.28)       | 53173 (87.72)     |
| CO2 (meq/L)                 | 484479 (24.68)      | 472690 (24.85)        | 11789 (19.45)     |
| O2 Saturation (%)           | 1477970 (75.29)     | 1437076 (75.54)       | 40894 (67.47)     |
| Calcium (mg/dL)             | 281253 (14.33)      | 270656 (14.23)        | 10597 (17.48)     |
| Phosphorus (mg/dL)          | 1565468 (79.75)     | 1526077 (80.22)       | 39391 (64.99)     |
| Magnesium, mmol/L           | 1493027 (76.06)     | 1452568 (76.35)       | 40459 (66.75)     |
| Chloride, mmol/L            | 45241 (2.3)         | 43732 (2.3)           | 1509 (2.49)       |
| Serum Osmolality, mOsm/L    | 1943597 (99.1)      | 1885015 (99.09)       | 58582 (96.65)     |
| Anion Gap mmol/L            | 564377 (28.75)      | 545267 (28.66)        | 19110 (31.53)     |
| Intact PTH (pg/mL)          | 1955186 (99.6)      | 1894979 (99.61)       | 60207 (99.33)     |
| Ferritin (ng/mL)            | 1907588 (97.18)     | 1848979 (97.19)       | 58609 (96.69)     |
| Iron saturation (%)         | 1960787 (99.89)     | 1900277 (99.89)       | 60510 (99.83)     |
| Hemoglobin (g/dL)           | 86589 (4.41)        | 83922 (4.41)          | 2667 (4.4)        |
| WBC (>10 <sup>3</sup> /mL)  | 574255 (29.25)      | 556806 (29.27)        | 17449 (28.79)     |
| Platelet Count              | 1751631 (89.23)     | 1698771 (89.3)        | 52860 (87.21)     |
| Serum Uric Acid (mmol/L)    | 1870217 (95.27)     | 1812960 (95.3)        | 57257 (94.46)     |
| Blood Urea Nitrogen, mmol/L | 63786 (3.25)        | 61724 (3.24)          | 2062 (3.4)        |
| AST, U/L                    | 761600 (38.8)       | 739835 (38.89)        | 21765 (35.91)     |
| ALT, U/L                    | 648617 (33.04)      | 630125 (33.12)        | 18492 (30.51)     |
| Total Bilirubin, μmol/L     | 666907 (33.97)      | 648204 (34.07)        | 18703 (30.86)     |
| Serum Total Protein, mg/dL  | 629715 (32.08)      | 613289 (32.24)        | 16426 (27.1)      |

## Supplemental Table 2. Profile of Hospitalized Patients with and Without Hyponatremia

Normonatremia: [Na]: >135-145 mEq/L; Hyponatremia: [Na]: >145 mEq/L (Mild Hyponatremia: [Na] >145-150 mEq/L, Moderate Hyponatremia: [Na] >150-155 mEq/L, Severe Hyponatremia: [Na] >155 mEq/L). The percentages represent the percentage of each outcome within each [Na] category.

| Natremia Status at Hospital Admission |                 | In-Hospital Mortality, n (%) | Discharge to Hospice, n (%) | Discharge to Nursing Facility, n (%) | Discharge to Home, n (%) |
|---------------------------------------|-----------------|------------------------------|-----------------------------|--------------------------------------|--------------------------|
| <b>Normonatremia</b>                  |                 | 41,352 (85.3)                | 13,930 (92.4)               | 219,415 (93.4)                       | 1,627,709 (97.79)        |
| <b>Hyponatremia</b>                   | <b>Mild</b>     | 5,097 (10.5)                 | 793 (5.3)                   | 11,918 (5.1)                         | 34,133 (2.1)             |
|                                       | <b>Moderate</b> | 1,325 (2.7)                  | 210 (1.4)                   | 2,200 (0.9)                          | 2,054 (0.1)              |
|                                       | <b>Severe</b>   | 695 (1.4)                    | 150 (1.0)                   | 1,435(0.6)                           | 604 (0.0)                |
| <b>eGFR Groups</b>                    |                 |                              |                             |                                      |                          |
| <b>Normonatremia</b>                  | <b>&lt;15</b>   | 3,116 (7.5)                  | 580 (4.2)                   | 7,294 (3.3)                          | 26,967 (1.7)             |
|                                       | <b>15-29</b>    | 6,109 (14.8)                 | 1,329 (9.5)                 | 19,214 (8.8)                         | 43,955 (2.7)             |
|                                       | <b>30-59</b>    | 13,945 (33.7)                | 4,074 (29.2)                | 75,253 (34.3)                        | 248,454 (15.3)           |
|                                       | <b>60-89</b>    | 12,214 (29.5)                | 4,828 (34.7)                | 85,920 (39.2)                        | 546,724 (33.6)           |
|                                       | <b>≥ 90</b>     | 5,968 (14.4)                 | 3,119 (22.4)                | 31,734 (14.5)                        | 761,609 (46.8)           |
| <b>Mild Hyponatremia</b>              | <b>&lt;15</b>   | 384 (5.4)                    | 58 (5.0)                    | 569 (3.7)                            | 997 (2.7)                |
|                                       | <b>15-29</b>    | 946 (13.3)                   | 116 (10.1)                  | 1,719 (11.1)                         | 1,864 (5.1)              |
|                                       | <b>30-59</b>    | 2,002 (28.1)                 | 261 (22.6)                  | 4,660 (30.0)                         | 8,051 (21.9)             |
|                                       | <b>60-89</b>    | 1,215 (17.1)                 | 244 (21.2)                  | 3,594 (23.1)                         | 11,438 (31.1)            |
|                                       | <b>≥ 90</b>     | 550 (7.7)                    | 114 (9.9)                   | 1,376 (8.8)                          | 11,783 (32.0)            |
| <b>Moderate Hyponatremia</b>          | <b>&lt;15</b>   | 159 (2.2)                    | 31 (2.7)                    | 196 (1.3)                            | 119 (0.3)                |
|                                       | <b>15-29</b>    | 276 (3.9)                    | 42 (3.6)                    | 463 (3.0)                            | 215 (0.6)                |
|                                       | <b>30-59</b>    | 477 (6.7)                    | 71 (6.2)                    | 817 (5.3)                            | 561 (1.5)                |
|                                       | <b>60-89</b>    | 274 (3.8)                    | 51 (4.4)                    | 514 (3.3)                            | 536 (1.5)                |
|                                       | <b>≥ 90</b>     | 139 (2.0)                    | 15 (1.3)                    | 210 (1.4)                            | 623 (1.7)                |
| <b>Severe Hyponatremia</b>            | <b>&lt;15</b>   | 131 (1.8)                    | 29 (2.5)                    | 192 (1.2)                            | 43 (0.1)                 |
|                                       | <b>15-29</b>    | 218 (3.1)                    | 29 (2.5)                    | 383 (2.5)                            | 115 (0.3)                |
|                                       | <b>30-59</b>    | 224 (3.1)                    | 58 (5.0)                    | 538 (3.5)                            | 219 (0.6)                |
|                                       | <b>60-89</b>    | 86 (1.2)                     | 28 (2.4)                    | 239 (1.5)                            | 124 (0.3)                |
|                                       | <b>≥ 90</b>     | 36(0.5)                      | 6(0.5)                      | 83(0.5)                              | 103(0.3)                 |
| <b>Age groups</b>                     |                 |                              |                             |                                      |                          |
| <b>Normonatremia</b>                  | <b>18-45</b>    | 2,778 (6.7)                  | 587 (4.2)                   | 5,076 (2.3)                          | 504,021 (30.9)           |
|                                       | <b>46-65</b>    | 9,950 (24.1)                 | 2,764 (19.8)                | 33,733 (15.4)                        | 615,512 (37.8)           |
|                                       | <b>66-75</b>    | 8,865 (20.7)                 | 2,866 (20.6)                | 44,573 (20.3)                        | 266,816 (16.3)           |
|                                       | <b>76-89</b>    | 15,583 (37.7)                | 5,505 (39.5)                | 103,799 (47.3)                       | 216,852 (13.2)           |
|                                       | <b>≥ 90</b>     | 4,476 (10.8)                 | 2,208 (15.8)                | 32,234 (14.7)                        | 24,508 (1.5)             |
| <b>Mild Hyponatremia</b>              | <b>18-45</b>    | 531 (7.5)                    | 15 (1.3)                    | 251 (1.6)                            | 7,645 (20.8)             |
|                                       | <b>46-65</b>    | 1,213 (17.0)                 | 92 (7.8)                    | 1,652 (10.4)                         | 13,123 (35.7)            |
|                                       | <b>66-75</b>    | 873 (12.3)                   | 176 (14.8)                  | 2,319 (14.6)                         | 6,491 (17.6)             |
|                                       | <b>76-89</b>    | 1,821 (25.6)                 | 364 (30.7)                  | 5,949 (37.4)                         | 6,009 (16.3)             |

|                                   |              |           |            |              |             |
|-----------------------------------|--------------|-----------|------------|--------------|-------------|
|                                   | <b>≥ 90</b>  | 659 (9.3) | 168 (14.2) | 2,014 (12.7) | 865 (2.3)   |
| <b>Moderate<br/>Hypernatremia</b> | <b>18-45</b> | 152 (2.1) | 1 (0.1)    | 40 (0.3)     | 758 (1.2)   |
|                                   | <b>46-65</b> | 287 (4.0) | 17 (1.4)   | 353 (2.2)    | 1,364 (2.2) |
|                                   | <b>66-75</b> | 216 (3.0) | 23 (1.9)   | 402 (2.5)    | 917 (1.5)   |
|                                   | <b>76-89</b> | 489 (6.8) | 114 (9.6)  | 1,071 (6.7)  | 2,025 (3.3) |
|                                   | <b>≥ 90</b>  | 181 (2.5) | 59 (5.0)   | 393 (2.5)    | 725 (1.2)   |
| <b>Severe<br/>Hypernatremia</b>   | <b>18-45</b> | 51 (0.7)  | 3 (0.3)    | 24 (0.2)     | 195 (0.3)   |
|                                   | <b>46-65</b> | 96 (1.4)  | 9 (0.8)    | 181 (1.1)    | 475 (0.8)   |
|                                   | <b>66-75</b> | 117 (1.6) | 26 (2.2)   | 250 (1.6)    | 469 (0.7)   |
|                                   | <b>76-89</b> | 301 (4.2) | 77 (6.5)   | 766 (4.8)    | 1,272 (2.0) |
|                                   | <b>≥ 90</b>  | 130 (1.8) | 43 (3.6)   | 254 (1.6)    | 473 (7.6)   |
